# Supplementary material
Source: Springer Nature journal article supplement (https://www.springermedizin.de/resource/supplementary/12955_2004_138_MOESM1_ESM.pdf/9559746)

Performances with impacts

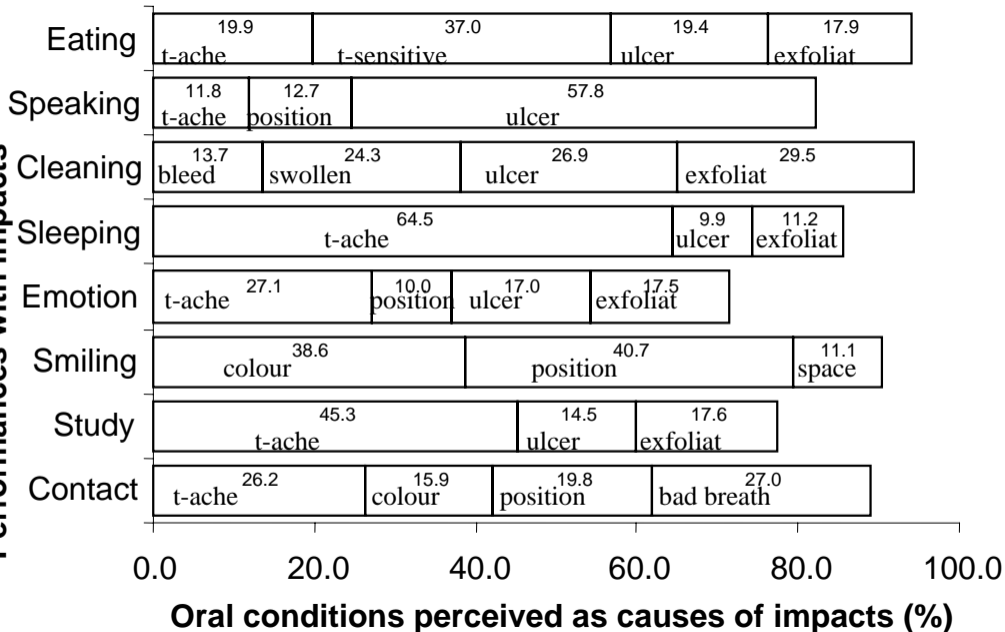

Supplement: MOESM1 [file 9559746]
